# Supplementary material for: Impacts of ice-nucleating particles from marine aerosols on mixed-phase orographic clouds during 2015 ACAPEX field campaign
Source: Copernicus journal article supplement (doi:10.5194/acp-2021-755), 2021-10-29
Supplement: Supplementary file 1 [file acp-2021-755-supplement.pdf]

## Support information

This file includes

Table S1

Fig. S1-S3

**Table S1.** Emissions in California based on EPA NEI in 2010, 2012, and 2014 (unit of 1000 tons).

| <b>Species</b>    | <b>2010</b> | <b>2012</b> | <b>2014</b> |
|-------------------|-------------|-------------|-------------|
| CO                | 9601.807    | 3445.952    | 5607.007    |
| NH <sub>3</sub>   | 1273.116    | 850.5079    | 510.4905    |
| NO <sub>x</sub>   | 851.5883    | 674.9153    | 585.4978    |
| PM <sub>10</sub>  | 1198.705    | 469.3941    | 714.4845    |
| PM <sub>2.5</sub> | 712.6443    | 200.5515    | 403.0768    |
| SO <sub>2</sub>   | 75.54085    | 33.26507    | 47.19099    |
| VOC               | 2202.771    | 842.6653    | 1471.331    |

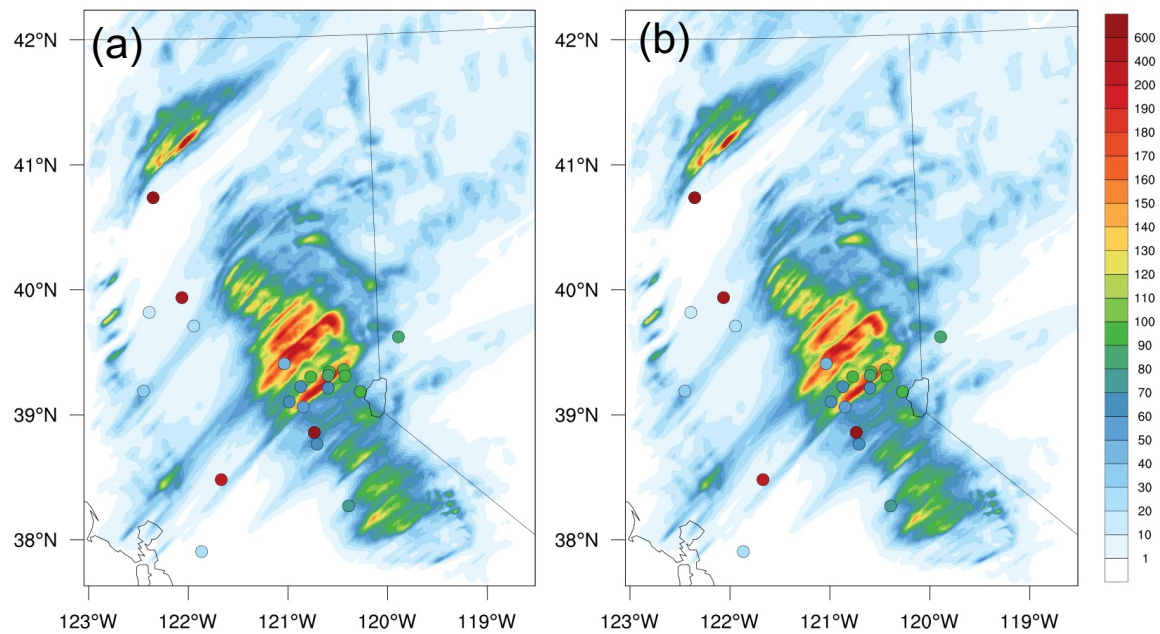

**Figure S1.** Modeled daily accumulated precipitation from (a) the simulation using WRF-Chem-SBM fully-coupled model and (b) the simulation using WRF-SBM with the aerosols hourly interpreted from a coarse resolution WRF-Chem simulation for 07 February during 00:00-23:00 UTC. The overlaid circles are the rain gauge measurements.

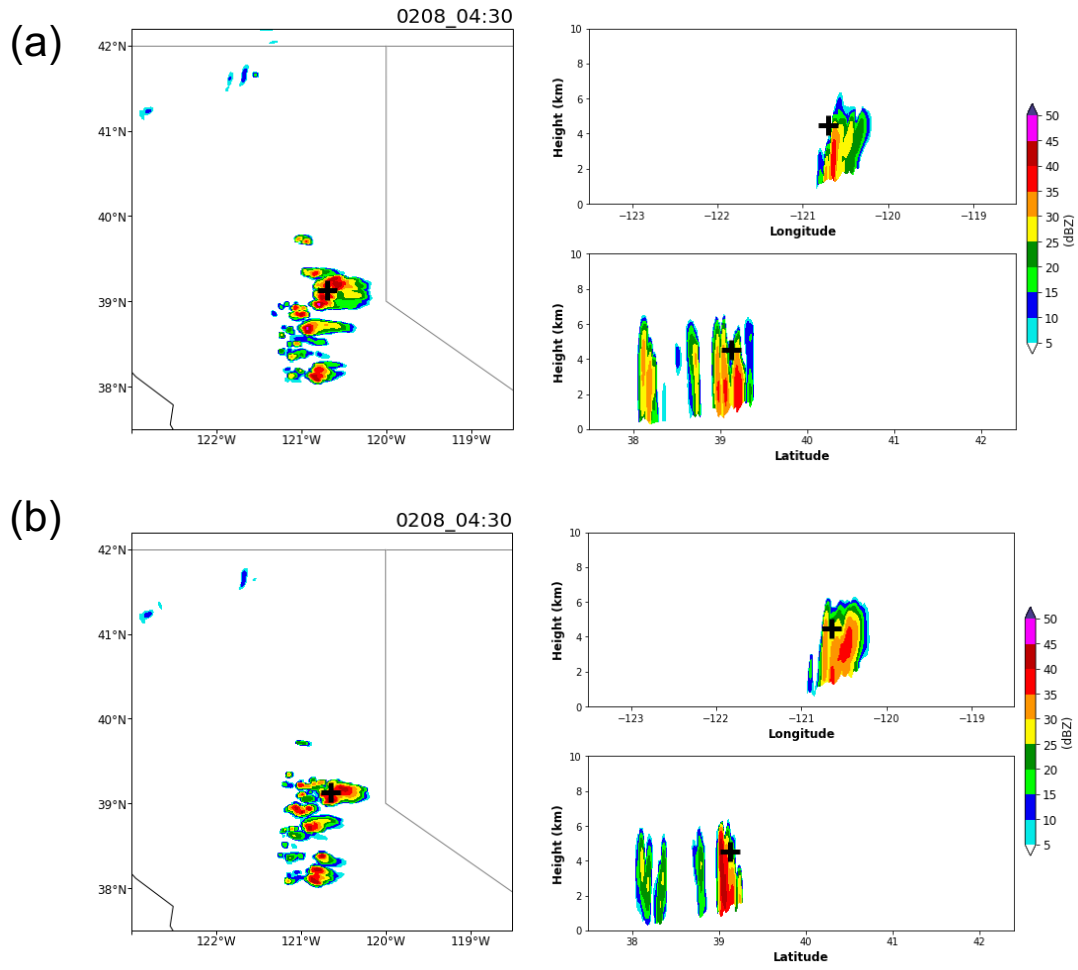

**Figure S2.** Same as Figure 4b, except for the simulations of (a) Bigg and (b) DM15.

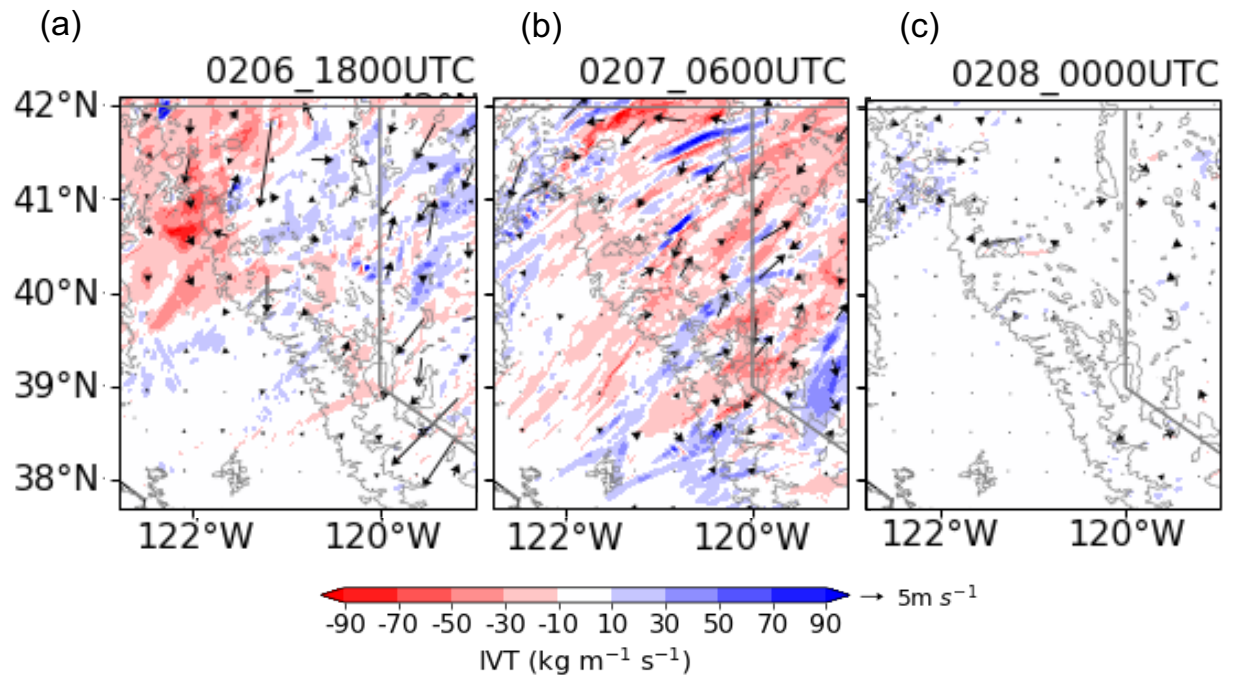

**Figure S3.** Differences of IVT (color) and wind (vector) between DM15+MC18 and DM15 at a time from the stages (a) before landfall, (b) after landfall, and (c) post-AR.
